# Supplementary material for: Alterations in urinary ceramides, sphingoid bases, and their phosphates among patients with kidney disease
Source: PubMed Central journal article supplement (PMC10949895; doi:10.3389/fneph.2024.1343181), 2024-03-07
Supplement: Table_1.pdf [file Table_1.pdf]

Alterations in urinary ceramides, sphingoid bases, and their phosphates among patients with kidney disease

*The Frontiers in Nephrology*

Yoshifumi Morita,<sup>1</sup> Eri Sakai,<sup>1</sup> Hideaki Isago,<sup>1,2</sup> Yoshikazu Ono,<sup>1</sup> Yutaka Yatomi,<sup>1,2</sup> Makoto Kurano<sup>1,2</sup>

<sup>1</sup>Department of Clinical Laboratory, The University of Tokyo Hospital, Tokyo, Japan

<sup>2</sup>Department of Clinical Laboratory Medicine, Graduate School of Medicine, The University of Tokyo,  
Tokyo, Japan

Corresponding author:

Yoshifumi Morita, PhD, and Makoto Kurano, MD, PhD

Department of Clinical Laboratory, University of Tokyo Hospital,

The University of Tokyo, 7-3-1 Hongo, Bunkyo-ku, Tokyo 113-8655, Japan

Tel: +81-3-3815-5411; Fax: +81-3-5689-0495

E-mail: moritay-lab@h.u-tokyo.ac.jp (Y.M.) and kurano-ky@umin.ac.jp (M.K.)

Supplemental Tables

Table S1. Clinical characteristics of participants

|                              | control           | chronic<br>glomerulonephritis | diabetes mellitus | arterial<br>hypertension | Systemic<br>nephritis | lupus | <i>P</i> value |
|------------------------------|-------------------|-------------------------------|-------------------|--------------------------|-----------------------|-------|----------------|
| n                            | 80                | 126                           | 167               | 39                       | 88                    |       |                |
| Urinary chemistry (dipstick) |                   |                               |                   |                          |                       |       |                |
| SG                           | 1.02 [1.01, 1.03] | 1.01 [1.00, 1.03]             | 1.02 [1.00, 1.03] | 1.01 [1.01, 1.03]        | 1.01 [1.00, 1.03]     |       | 0.001          |
| pH (%)                       |                   |                               |                   |                          |                       |       |                |
| 5.0                          | 12 ( 15.0)        | 44 (34.9)                     | 53 (31.7)         | 16 ( 41.0)               | 13 ( 17.3)            |       | 0.012          |
| 5.5                          | 21 ( 26.2)        | 23 (18.3)                     | 44 (26.3)         | 12 ( 30.8)               | 14 ( 18.7)            |       |                |
| 6.0                          | 17 ( 21.2)        | 24 (19.0)                     | 19 (11.4)         | 4 ( 10.3)                | 15 ( 20.0)            |       |                |
| 6.5                          | 20 ( 25.0)        | 16 (12.7)                     | 20 (12.0)         | 3 ( 7.7)                 | 14 ( 18.7)            |       |                |
| 7.0                          | 5 ( 6.2)          | 17 (13.5)                     | 19 (11.4)         | 3 ( 7.7)                 | 13 ( 17.3)            |       |                |
| 7.5                          | 4 ( 5.0)          | 2 ( 1.6)                      | 8 ( 4.8)          | 1 ( 2.6)                 | 4 ( 5.3)              |       |                |
| 8.0                          | 0 ( 0.0)          | 0 ( 0.0)                      | 3 ( 1.8)          | 0 ( 0.0)                 | 2 ( 2.7)              |       |                |
| 8.5                          | 1 ( 1.2)          | 0 ( 0.0)                      | 1 ( 0.6)          | 0 ( 0.0)                 | 0 ( 0.0)              |       |                |
| BLD                          |                   |                               |                   |                          |                       |       |                |
| (-)                          | 80 (100.0)        | 41 (32.5)                     | 127 (76.0)        | 34 ( 87.2)               | 57 ( 76.0)            |       | <0.001         |
| (1+)                         | 0 ( 0.0)          | 12 ( 9.5)                     | 25 (15.0)         | 2 ( 5.1)                 | 5 ( 6.7)              |       |                |
| (2+)                         | 0 ( 0.0)          | 30 (23.8)                     | 14 ( 8.4)         | 3 ( 7.7)                 | 6 ( 8.0)              |       |                |
| (3+)                         | 0 ( 0.0)          | 43 (34.1)                     | 1 ( 0.6)          | 0 ( 0.0)                 | 7 ( 9.3)              |       |                |
| GLU                          |                   |                               |                   |                          |                       |       |                |
| (-)                          | 80 (100.0)        | 125 (99.2)                    | 102 (61.1)        | 38 ( 97.4)               | 70 ( 93.3)            |       | <0.001         |
| (1+)                         | 0 ( 0.0)          | 0 ( 0.0)                      | 11 ( 6.6)         | 0 ( 0.0)                 | 4 ( 5.3)              |       |                |
| (2+)                         | 0 ( 0.0)          | 0 ( 0.0)                      | 12 ( 7.2)         | 0 ( 0.0)                 | 1 ( 1.3)              |       |                |
| (3+)                         | 0 ( 0.0)          | 0 ( 0.0)                      | 19 (11.4)         | 0 ( 0.0)                 | 0 ( 0.0)              |       |                |
| (4+)                         | 0 ( 0.0)          | 1 ( 0.8)                      | 23 (13.8)         | 1 ( 2.6)                 | 0 ( 0.0)              |       |                |
| Urinary sediment             |                   |                               |                   |                          |                       |       |                |
| RBC (%)                      |                   |                               |                   |                          |                       |       |                |
| <1 /HPF                      | 69 ( 86.2)        | 29 (23.6)                     | 105 (64.8)        | 28 ( 71.8)               | 45 ( 51.7)            |       | <0.001         |
| 1-4 /HPF                     | 10 ( 12.5)        | 21 (17.1)                     | 39 (24.1)         | 9 ( 23.1)                | 20 ( 23.0)            |       |                |
| 5-9 /HPF                     | 1 ( 1.2)          | 13 (10.6)                     | 11 ( 6.8)         | 2 ( 5.1)                 | 4 ( 4.6)              |       |                |
| 10-19 /HPF                   | 0 ( 0.0)          | 17 (13.8)                     | 4 ( 2.5)          | 0 ( 0.0)                 | 7 ( 8.0)              |       |                |
| 20-29 /HPF                   | 0 ( 0.0)          | 13 (10.6)                     | 3 ( 1.9)          | 0 ( 0.0)                 | 3 ( 3.4)              |       |                |
| 30-49 /HPF                   | 0 ( 0.0)          | 11 ( 8.9)                     | 0 ( 0.0)          | 0 ( 0.0)                 | 3 ( 3.4)              |       |                |
| 50-99 /HPF                   | 0 ( 0.0)          | 11 ( 8.9)                     | 0 ( 0.0)          | 0 ( 0.0)                 | 2 ( 2.3)              |       |                |
| 100≤ /HPF                    | 0 ( 0.0)          | 8 ( 6.5)                      | 0 ( 0.0)          | 0 ( 0.0)                 | 3 ( 3.4)              |       |                |

|                         |            |            |           |            |            |            |        |
|-------------------------|------------|------------|-----------|------------|------------|------------|--------|
| WBC (%)                 | <1 /HPF    | 55 ( 68.8) | 54 (43.9) | 104 (64.2) | 33 ( 84.6) | 33 ( 37.9) | <0.001 |
|                         | 1-4 /HPF   | 23 ( 28.7) | 45 (36.6) | 34 (21.0)  | 5 ( 12.8)  | 31 ( 35.6) |        |
|                         | 5-9 /HPF   | 1 ( 1.2)   | 15 (12.2) | 12 ( 7.4)  | 0 ( 0.0)   | 9 ( 10.3)  |        |
|                         | 10-19 /HPF | 1 ( 1.2)   | 6 ( 4.9)  | 5 ( 3.1)   | 0 ( 0.0)   | 6 ( 6.9)   |        |
|                         | 20-29 /HPF | 0 ( 0.0)   | 1 ( 0.8)  | 3 ( 1.9)   | 0 ( 0.0)   | 2 ( 2.3)   |        |
|                         | 30-49 /HPF | 0 ( 0.0)   | 2 ( 1.6)  | 0 ( 0.0)   | 0 ( 0.0)   | 3 ( 3.4)   |        |
|                         | 50-99 /HPF | 0 ( 0.0)   | 0 ( 0.0)  | 1 ( 0.6)   | 1 ( 2.6)   | 1 ( 1.1)   |        |
|                         | 100≤ /HPF  | 0 ( 0.0)   | 0 ( 0.0)  | 3 ( 1.9)   | 0 ( 0.0)   | 2 ( 2.3)   |        |
| Renal tubular cells (%) | (-)        | 80 (100.0) | 89 (72.4) | 141 (87.0) | 34 ( 87.2) | 69 ( 84.1) | <0.001 |
|                         | <1 /HPF    | 0 ( 0.0)   | 20 (16.3) | 13 ( 8.0)  | 4 ( 10.3)  | 9 ( 11.0)  |        |
|                         | 1≤ /HPF    | 0 ( 0.0)   | 14 (11.4) | 8 ( 4.9)   | 1 ( 2.6)   | 4 ( 4.9)   |        |
| Oval fat bodies (%)     | (-)        | 80 (100.0) | 82 (66.7) | 131 (80.9) | 31 ( 79.5) | 69 ( 84.1) | 0.002  |
|                         | 1-4 /WF    | 0 ( 0.0)   | 11 ( 8.9) | 13 ( 8.0)  | 4 ( 10.3)  | 3 ( 3.7)   |        |
|                         | 5-9 /WF    | 0 ( 0.0)   | 9 ( 7.3)  | 7 ( 4.3)   | 2 ( 5.1)   | 2 ( 2.4)   |        |
|                         | 10-19 /WF  | 0 ( 0.0)   | 10 ( 8.1) | 3 ( 1.9)   | 1 ( 2.6)   | 2 ( 2.4)   |        |
|                         | 20-29 /WF  | 0 ( 0.0)   | 3 ( 2.4)  | 1 ( 0.6)   | 0 ( 0.0)   | 2 ( 2.4)   |        |
|                         | 30-49 /WF  | 0 ( 0.0)   | 1 ( 0.8)  | 4 ( 2.5)   | 1 ( 2.6)   | 2 ( 2.4)   |        |
|                         | 50-99 /WF  | 0 ( 0.0)   | 4 ( 3.3)  | 3 ( 1.9)   | 0 ( 0.0)   | 2 ( 2.4)   |        |
|                         | 100≤ /WF   | 0 ( 0.0)   | 3 ( 2.4)  | 0 ( 0.0)   | 0 ( 0.0)   | 0 ( 0.0)   |        |
| Hyaline casts (%)       | (-)        | 63 ( 78.8) | 15 (12.2) | 45 (27.8)  | 7 ( 17.9)  | 46 ( 56.1) | <0.001 |
|                         | 1-4 /WF    | 17 ( 21.2) | 10 ( 8.1) | 25 (15.4)  | 2 ( 5.1)   | 6 ( 7.3)   |        |
|                         | 5-9 /WF    | 0 ( 0.0)   | 17 (13.8) | 10 ( 6.2)  | 8 ( 20.5)  | 3 ( 3.7)   |        |
|                         | 10-19 /WF  | 0 ( 0.0)   | 22 (17.9) | 19 (11.7)  | 5 ( 12.8)  | 3 ( 3.7)   |        |
|                         | 20-29 /WF  | 0 ( 0.0)   | 11 ( 8.9) | 16 ( 9.9)  | 4 ( 10.3)  | 2 ( 2.4)   |        |
|                         | 30-49 /WF  | 0 ( 0.0)   | 13 (10.6) | 11 ( 6.8)  | 4 ( 10.3)  | 6 ( 7.3)   |        |
|                         | 50-99 /WF  | 0 ( 0.0)   | 18 (14.6) | 11 ( 6.8)  | 1 ( 2.6)   | 6 ( 7.3)   |        |
|                         | 100≤ /WF   | 0 ( 0.0)   | 17 (13.8) | 25 (15.4)  | 8 ( 20.5)  | 10 ( 12.2) |        |
| Epithelial casts (%)    | (-)        | 80 (100.0) | 51 (41.5) | 109 (67.3) | 30 ( 76.9) | 61 ( 74.4) | <0.001 |
|                         | 1-4 /WF    | 0 ( 0.0)   | 36 (29.3) | 36 (22.2)  | 6 ( 15.4)  | 15 ( 18.3) |        |
|                         | 5-9 /WF    | 0 ( 0.0)   | 19 (15.4) | 8 ( 4.9)   | 1 ( 2.6)   | 3 ( 3.7)   |        |
|                         | 10-19 /WF  | 0 ( 0.0)   | 11 ( 8.9) | 7 ( 4.3)   | 2 ( 5.1)   | 1 ( 1.2)   |        |
|                         | 20-29 /WF  | 0 ( 0.0)   | 4 ( 3.3)  | 1 ( 0.6)   | 0 ( 0.0)   | 2 ( 2.4)   |        |
|                         | 30-49 /WF  | 0 ( 0.0)   | 2 ( 1.6)  | 1 ( 0.6)   | 0 ( 0.0)   | 0 ( 0.0)   |        |
| Granular casts (%)      | (-)        | 80 (100.0) | 67 (54.5) | 113 (69.8) | 29 ( 74.4) | 66 ( 80.5) | <0.001 |
|                         | 1-4 /WF    | 0 ( 0.0)   | 23 (18.7) | 19 (11.7)  | 5 ( 12.8)  | 7 ( 8.5)   |        |
|                         | 5-9 /WF    | 0 ( 0.0)   | 15 (12.2) | 7 ( 4.3)   | 1 ( 2.6)   | 4 ( 4.9)   |        |

|                              |           |            |            |            |            |            |        |
|------------------------------|-----------|------------|------------|------------|------------|------------|--------|
|                              | 10-19 /WF | 0 ( 0.0)   | 9 ( 7.3)   | 10 ( 6.2)  | 2 ( 5.1)   | 3 ( 3.7)   |        |
|                              | 20-29 /WF | 0 ( 0.0)   | 5 ( 4.1)   | 2 ( 1.2)   | 0 ( 0.0)   | 1 ( 1.2)   |        |
|                              | 30-49 /WF | 0 ( 0.0)   | 1 ( 0.8)   | 3 ( 1.9)   | 1 ( 2.6)   | 0 ( 0.0)   |        |
|                              | 50-99 /WF | 0 ( 0.0)   | 3 ( 2.4)   | 3 ( 1.9)   | 1 ( 2.6)   | 1 ( 1.2)   |        |
|                              | 100≤ /WF  | 0 ( 0.0)   | 0 ( 0.0)   | 5 ( 3.1)   | 0 ( 0.0)   | 0 ( 0.0)   |        |
| Waxy casts (%)               | (-)       | 80 (100.0) | 109 (88.6) | 142 (87.7) | 37 ( 94.9) | 76 ( 92.7) | 0.269  |
|                              | 1-4 /WF   | 0 ( 0.0)   | 13 (10.6)  | 12 ( 7.4)  | 1 ( 2.6)   | 4 ( 4.9)   |        |
|                              | 5-9 /WF   | 0 ( 0.0)   | 0 ( 0.0)   | 4 ( 2.5)   | 1 ( 2.6)   | 1 ( 1.2)   |        |
|                              | 10-19 /WF | 0 ( 0.0)   | 0 ( 0.0)   | 1 ( 0.6)   | 0 ( 0.0)   | 1 ( 1.2)   |        |
|                              | 20-29 /WF | 0 ( 0.0)   | 1 ( 0.8)   | 0 ( 0.0)   | 0 ( 0.0)   | 0 ( 0.0)   |        |
|                              | 30-49 /WF | 0 ( 0.0)   | 0 ( 0.0)   | 2 ( 1.2)   | 0 ( 0.0)   | 0 ( 0.0)   |        |
|                              | 50-99 /WF | 0 ( 0.0)   | 0 ( 0.0)   | 0 ( 0.0)   | 0 ( 0.0)   | 0 ( 0.0)   |        |
|                              | 100≤ /WF  | 0 ( 0.0)   | 0 ( 0.0)   | 1 ( 0.6)   | 0 ( 0.0)   | 0 ( 0.0)   |        |
| Fatty casts (%)              | (-)       | 80 (100.0) | 82 (66.7)  | 131 (80.9) | 31 ( 79.5) | 68 ( 82.9) | 0.009  |
|                              | 1-4 /WF   | 0 ( 0.0)   | 23 (18.7)  | 17 (10.5)  | 7 ( 17.9)  | 7 ( 8.5)   |        |
|                              | 5-9 /WF   | 0 ( 0.0)   | 7 ( 5.7)   | 7 ( 4.3)   | 0 ( 0.0)   | 4 ( 4.9)   |        |
|                              | 10-19 /WF | 0 ( 0.0)   | 7 ( 5.7)   | 5 ( 3.1)   | 1 ( 2.6)   | 2 ( 2.4)   |        |
|                              | 20-29 /WF | 0 ( 0.0)   | 0 ( 0.0)   | 1 ( 0.6)   | 0 ( 0.0)   | 1 ( 1.2)   |        |
|                              | 30-49 /WF | 0 ( 0.0)   | 1 ( 0.8)   | 1 ( 0.6)   | 0 ( 0.0)   | 0 ( 0.0)   |        |
|                              | 50-99 /WF | 0 ( 0.0)   | 2 ( 1.6)   | 0 ( 0.0)   | 0 ( 0.0)   | 0 ( 0.0)   |        |
|                              | 100≤ /WF  | 0 ( 0.0)   | 1 ( 0.8)   | 0 ( 0.0)   | 0 ( 0.0)   | 0 ( 0.0)   |        |
| RBC casts (%)                | (-)       | 80 (100.0) | 85 (69.1)  | 159 (98.1) | 39 (100.0) | 75 ( 91.5) | <0.001 |
|                              | 1-4 /WF   | 0 ( 0.0)   | 31 (25.2)  | 3 ( 1.9)   | 0 ( 0.0)   | 6 ( 7.3)   |        |
|                              | 5-9 /WF   | 0 ( 0.0)   | 6 ( 4.9)   | 0 ( 0.0)   | 0 ( 0.0)   | 1 ( 1.2)   |        |
|                              | 10-19 /WF | 0 ( 0.0)   | 1 ( 0.8)   | 0 ( 0.0)   | 0 ( 0.0)   | 0 ( 0.0)   |        |
| WBC casts (%)                | (-)       | 80 (100.0) | 113 (91.9) | 160 (98.8) | 38 ( 97.4) | 80 ( 97.6) | 0.018  |
|                              | 1-4 /WF   | 0 ( 0.0)   | 8 ( 6.5)   | 1 ( 0.6)   | 1 ( 2.6)   | 0 ( 0.0)   |        |
|                              | 5-9 /WF   | 0 ( 0.0)   | 2 ( 1.6)   | 1 ( 0.6)   | 0 ( 0.0)   | 1 ( 1.2)   |        |
|                              | 10-19 /WF | 0 ( 0.0)   | 0 ( 0.0)   | 0 ( 0.0)   | 0 ( 0.0)   | 0 ( 0.0)   |        |
|                              | 20-29 /WF | 0 ( 0.0)   | 0 ( 0.0)   | 0 ( 0.0)   | 0 ( 0.0)   | 1 ( 1.2)   |        |
| Vacuolar denatured casts (%) | (-)       | 80 (100.0) | 119 (96.7) | 153 (94.4) | 37 ( 94.9) | 82 (100.0) | 0.514  |
|                              | 1-4 /WF   | 0 ( 0.0)   | 3 ( 2.4)   | 6 ( 3.7)   | 2 ( 5.1)   | 0 ( 0.0)   |        |
|                              | 5-9 /WF   | 0 ( 0.0)   | 1 ( 0.8)   | 2 ( 1.2)   | 0 ( 0.0)   | 0 ( 0.0)   |        |
|                              | 10-19 /WF | 0 ( 0.0)   | 0 ( 0.0)   | 0 ( 0.0)   | 0 ( 0.0)   | 0 ( 0.0)   |        |
|                              | 20-29 /WF | 0 ( 0.0)   | 0 ( 0.0)   | 0 ( 0.0)   | 0 ( 0.0)   | 0 ( 0.0)   |        |
|                              | 30-49 /WF | 0 ( 0.0)   | 0 ( 0.0)   | 0 ( 0.0)   | 0 ( 0.0)   | 0 ( 0.0)   |        |

|           |          |          |          |          |          |
|-----------|----------|----------|----------|----------|----------|
| 50-99 /WF | 0 ( 0.0) | 0 ( 0.0) | 0 ( 0.0) | 0 ( 0.0) | 0 ( 0.0) |
| 100≤/WF   | 0 ( 0.0) | 0 ( 0.0) | 1 ( 0.6) | 0 ( 0.0) | 0 ( 0.0) |

---

Data was presented as median [range] for SG.

Abbreviations: HPF, high power field; RBC, red blood cells; SG, specific gravity; WBC, white blood cells; WF, whole field.

**Table S2. Correlation analysis between urinary sphingolipids and eGFR and urinary total protein by kidney disease group**

| urinary total protein          | Chronic glomerulonephritis |           | Diabetes mellitus |           | Arterial hypertension |           | Systemic lupus nephritis |           |
|--------------------------------|----------------------------|-----------|-------------------|-----------|-----------------------|-----------|--------------------------|-----------|
|                                | $r_s$                      | $P$ value | $r_s$             | $P$ value | $r_s$                 | $P$ value | $r_s$                    | $P$ value |
| sphingosine 1-phosphate        | 0.47                       | <0.001    | 0.68              | <0.001    | 0.42                  | 0.007     | 0.41                     | <0.001    |
| dihydrosphingosine 1-phosphate | 0.16                       | 0.101     | 0.06              | 0.669     | -0.03                 | 0.839     | 0.34                     | 0.001     |
| sphingosine                    | 0.44                       | <0.001    | 0.71              | <0.001    | 0.24                  | 0.137     | 0.36                     | 0.001     |
| dihydrosphingosine             | 0.30                       | 0.002     | 0.40              | <0.001    | 0.09                  | 0.595     | 0.42                     | <0.001    |
| ceramide C16:0                 | 0.36                       | <0.001    | 0.69              | <0.001    | 0.13                  | 0.415     | 0.53                     | <0.001    |
| ceramide C18:0                 | 0.38                       | <0.001    | 0.69              | <0.001    | 0.16                  | 0.316     | 0.58                     | <0.001    |
| ceramide C18:1                 | 0.25                       | 0.010     | 0.62              | <0.001    | 0.20                  | 0.215     | 0.46                     | <0.001    |
| ceramide C20:0                 | 0.33                       | 0.001     | 0.66              | <0.001    | -0.02                 | 0.903     | 0.51                     | <0.001    |
| ceramide C22:0                 | 0.40                       | <0.001    | 0.71              | <0.001    | 0.10                  | 0.546     | 0.57                     | <0.001    |
| ceramide C24:0                 | 0.39                       | <0.001    | 0.69              | <0.001    | 0.17                  | 0.294     | 0.57                     | <0.001    |
| <hr/>                          |                            |           |                   |           |                       |           |                          |           |
| eGFR                           |                            |           |                   |           |                       |           |                          |           |
| sphingosine 1-phosphate        | 0.03                       | 0.743     | -0.17             | 0.191     | -0.40                 | 0.014     | -0.17                    | 0.116     |
| dihydrosphingosine 1-phosphate | -0.08                      | 0.403     | -0.05             | 0.720     | -0.28                 | 0.091     | 0.06                     | 0.572     |
| sphingosine                    | -0.17                      | 0.089     | -0.51             | <0.001    | -0.20                 | 0.220     | 0.14                     | 0.209     |
| dihydrosphingosine             | -0.18                      | 0.071     | -0.19             | 0.031     | 0.00                  | 0.987     | 0.08                     | 0.456     |
| ceramide C16:0                 | -0.21                      | 0.034     | -0.48             | <0.001    | -0.16                 | 0.338     | -0.07                    | 0.496     |
| ceramide C18:0                 | -0.21                      | 0.032     | -0.50             | <0.001    | -0.25                 | 0.127     | -0.06                    | 0.586     |
| ceramide C18:1                 | -0.14                      | 0.152     | -0.43             | <0.001    | -0.20                 | 0.238     | 0.08                     | 0.454     |
| ceramide C20:0                 | -0.19                      | 0.050     | -0.49             | <0.001    | -0.17                 | 0.296     | -0.10                    | 0.362     |
| ceramide C22:0                 | -0.18                      | 0.070     | -0.50             | <0.001    | -0.18                 | 0.268     | -0.16                    | 0.138     |
| ceramide C24:0                 | -0.13                      | 0.197     | -0.46             | <0.001    | -0.19                 | 0.242     | -0.07                    | 0.504     |

**Table S3. ROC analysis**

| CGN versus DM                   |                |       |                | CGN versus arterial hypertension |       |                | CGN versus SLE                   |       |                |
|---------------------------------|----------------|-------|----------------|----------------------------------|-------|----------------|----------------------------------|-------|----------------|
|                                 | variables      | AUC   | <i>P</i> value | variables                        | AUC   | <i>P</i> value | variables                        | AUC   | <i>P</i> value |
| 1                               | RBC            | 0.776 | 2.008E-18      | RBC                              | 0.798 | 3.805E-08      | Cer C24:0/TP                     | 0.816 | 2.154E-12      |
| 2                               | BLD            | 0.770 | 1.196E-20      | BLD                              | 0.798 | 1.169E-10      | PRO                              | 0.787 | 1.428E-17      |
| 3                               | dysmorphic RBC | 0.758 | 1.198E-24      | dysmorphic RBC                   | 0.774 | 7.033E-10      | Cer C22:0/TP                     | 0.786 | 1.015E-12      |
| 4                               | age            | 0.707 | 2.436E-11      | age                              | 0.768 | 2.438E-06      | Cer C16:0/TP                     | 0.783 | 7.77E-13       |
| 5                               | GLU            | 0.690 | 3.201E-15      | C20:0/C18:0                      | 0.721 | 8.7E-05        | Cer C18:0/TP                     | 0.780 | 3.694E-12      |
| 6                               | S1P/C20:0      | 0.684 | 2.193E-10      | gender                           | 0.708 | 1.908E-06      | Cer C18:1/TP                     | 0.761 | 4.005E-11      |
| 7                               | C22:0/C20:0    | 0.675 | 0.0037964      | Cer C20:0                        | 0.701 | 0.0005321      | Cer C20:0/TP                     | 0.750 | 1.537E-10      |
| 8                               | S1P/C16:0      | 0.672 | 6.879E-09      | Cer C20:0/TP                     | 0.695 | 0.0001031      | BLD                              | 0.747 | 4.911E-13      |
| 9                               | S1P/C22:0      | 0.672 | 2.784E-09      | WBC                              | 0.692 | 0.0023275      | C24:0/C20:0                      | 0.738 | 3.609E-08      |
| 10                              | S1P/C18:0      | 0.663 | 1.857E-08      | Cer C22:0/TP                     | 0.689 | 0.0001552      | C24:0/C22:0                      | 0.725 | 4.628E-07      |
| DM versus arterial hypertension |                |       |                | DM versus SLE                    |       |                | arterial hypertension versus SLE |       |                |
|                                 | variables      | AUC   | <i>P</i> value | variables                        | AUC   | <i>P</i> value | variables                        | AUC   | <i>P</i> value |
| 1                               | Cer C22:0/TP   | 0.770 | 1.146E-07      | C22:0/C20:0                      | 0.886 | 1.776E-16      | gender                           | 0.893 | 4.806E-24      |
| 2                               | Cer C22:0      | 0.770 | 4.838E-07      | Cer C24:0/TP                     | 0.880 | 1.387E-20      | age                              | 0.862 | 3.916E-10      |
| 3                               | C22:0/C16:0    | 0.769 | 1.439E-05      | C24:0/C20:0                      | 0.875 | 2.565E-13      | C24:0/C22:0                      | 0.851 | 1.976E-07      |
| 4                               | Cer C24:0      | 0.764 | 3.873E-06      | Cer C22:0/TP                     | 0.863 | 4.201E-19      | eGFR                             | 0.850 | 4.054E-09      |
| 5                               | Cer C18:0      | 0.756 | 3.752E-06      | Cer C18:0/TP                     | 0.846 | 4.541E-17      | C24:0/C20:0                      | 0.799 | 1.036E-07      |
| 6                               | Cer C20:0      | 0.754 | 6.269E-06      | Cer C16:0/TP                     | 0.842 | 3.544E-17      | dhSph/Sph                        | 0.782 | 0.0002444      |
| 7                               | Cer C16:0      | 0.752 | 7.644E-06      | Cer C24:0                        | 0.823 | 7.794E-17      | C20:0/C16:0                      | 0.751 | 2.54E-05       |
| 8                               | C22:0/C18:0    | 0.745 | 1.571E-05      | C24:0/C18:0                      | 0.816 | 9.535E-10      | C20:0/C18:0                      | 0.743 | 1.673E-05      |
| 9                               | Cer C18:1      | 0.737 | 7.205E-06      | Sphingosine                      | 0.813 | 9.788E-18      | WBC                              | 0.735 | 5.236E-05      |
| 10                              | Cer C24:0/TP   | 0.732 | 2.335E-06      | Cer C18:1/TP                     | 0.812 | 3.347E-15      | C24:0/C18:0                      | 0.719 | 0.0009374      |

Abbreviations: AUC, area under curve; CER, ceramide; CGN, chronic glomerulonephritis; dhS1P, dihydrosphingosine 1-phosphate; dhSph, dihydrosphingosine; DM, diabetes mellitus; S1P, sphingosine 1-phosphate; SLE, systemic lupus erythematosus; Sph, sphingosine; TP, total protein.

**Table S4. The constructed machine learning models**

| <b>the only clinical laboratory data</b>    |                 |               |                  |               |     |    |
|---------------------------------------------|-----------------|---------------|------------------|---------------|-----|----|
|                                             | <b>Accuracy</b> | <b>94.03%</b> | <b>Precision</b> | <b>66.96%</b> |     |    |
| Training                                    | Control         | CGN           | DM               | AH            | SLE |    |
| Control                                     | 58              | 0             | 0                | 0             | 0   | 0  |
| CGN                                         | 1               | 88            | 1                | 1             | 1   | 1  |
| DM                                          | 6               | 1             | 117              | 1             | 1   | 4  |
| AH                                          | 0               | 0             | 0                | 29            | 1   | 1  |
| SLE                                         | 0               | 1             | 5                | 0             | 0   | 70 |
| Testing                                     | Control         | CGN           | DM               | AH            | SLE |    |
| Control                                     | 19              | 0             | 3                | 0             | 0   | 0  |
| CGN                                         | 0               | 21            | 7                | 0             | 0   | 6  |
| DM                                          | 1               | 4             | 31               | 1             | 1   | 1  |
| AH                                          | 0               | 0             | 7                | 2             | 0   | 0  |
| SLE                                         | 1               | 4             | 3                | 0             | 0   | 4  |
| <b>the urinary sphingolipids were added</b> |                 |               |                  |               |     |    |
|                                             | <b>Accuracy</b> | <b>96.10%</b> | <b>Precision</b> | <b>78.26%</b> |     |    |
| Training                                    | Control         | CGN           | DM               | AH            | SLE |    |
| Control                                     | 56              | 0             | 1                | 0             | 0   | 1  |
| CGN                                         | 1               | 91            | 0                | 0             | 0   | 0  |
| DM                                          | 0               | 0             | 126              | 2             | 1   | 1  |
| AH                                          | 0               | 3             | 1                | 23            | 3   | 3  |
| SLE                                         | 0               | 2             | 0                | 0             | 0   | 74 |
| Testing                                     | Control         | CGN           | DM               | AH            | SLE |    |
| Control                                     | 21              | 1             | 0                | 0             | 0   | 0  |
| CGN                                         | 1               | 24            | 2                | 0             | 0   | 7  |
| DM                                          | 0               | 3             | 34               | 0             | 0   | 1  |
| AH                                          | 0               | 3             | 2                | 1             | 3   | 3  |
| SLE                                         | 0               | 1             | 1                | 0             | 0   | 10 |

Abbreviations: AH, arterial hypertension; CGN, chronic glomerulonephritis; DM, diabetes mellitus; SLE, systemic lupus erythematosus.



**Table S5. Stratified analysis for the urinary ceramides, sphingoid bases, and their phosphates among kidney disease adjusted by degree of proteinuria**

|                               | control            | chronic<br>glomerulonephritis | diabetes mellitus                  | arterial<br>hypertension       | systemic<br>erythematosus          | lupus | <i>P</i> value |
|-------------------------------|--------------------|-------------------------------|------------------------------------|--------------------------------|------------------------------------|-------|----------------|
| Normal (less than 150 mg/gCr) |                    |                               |                                    |                                |                                    |       |                |
| n                             | 80                 | 17                            | 65                                 | 10                             | 35                                 |       |                |
| SIP (nmol/mgCr)               | 0.11 [0.00, 0.39]  | 0.13 [0.10, 0.22]             | 0.45 [0.25, 0.47]                  | 0.20 [0.11, 0.34]              | 0.19 [0.05, 0.30]                  |       | 0.178          |
| dhSIP (nmol/mgCr)             | 5.02 [0.00, 18.24] | 0.06 [0.00, 0.89]             | 4.29 [2.43, 7.47] <sup>†</sup>     | 1.21 [0.00, 6.41]              | 0.91 [0.48, 1.68] <sup>‡</sup>     |       | 0.022          |
| Sphingosine (ng/mgCr)         | 0.47 [0.27, 0.95]  | 0.61 [0.53, 1.01]             | 0.17 [0.10, 0.30] <sup>*,†,‡</sup> | 0.82 [0.54, 1.66]              | 1.40 [0.98, 2.36] <sup>*,†,‡</sup> |       | <0.001         |
| dhSph (ng/mgCr)               | 0.14 [0.08, 0.23]  | 0.16 [0.10, 0.18]             | 0.38 [0.24, 0.57] <sup>*,†</sup>   | 0.42 [0.18, 0.77]              | 0.29 [0.18, 0.48] <sup>*</sup>     |       | <0.001         |
| CER C16:0 (ng/mgCr)           | 1.20 [0.53, 1.89]  | 1.27 [0.81, 2.05]             | 0.31 [0.21, 0.57] <sup>*,†</sup>   | 2.17 [1.59, 3.61] <sup>‡</sup> | 1.63 [1.08, 2.57] <sup>*,‡</sup>   |       | <0.001         |
| CER C18:0 (ng/mgCr)           | 0.20 [0.10, 0.30]  | 0.29 [0.12, 0.34]             | 0.06 [0.04, 0.11] <sup>*,†</sup>   | 0.39 [0.29, 0.94] <sup>‡</sup> | 0.31 [0.24, 0.44] <sup>*,‡</sup>   |       | <0.001         |
| CER C18:1 (ng/mgCr)           | 0.03 [0.02, 0.07]  | 0.04 [0.03, 0.11]             | 0.02 [0.02, 0.04]                  | 0.05 [0.04, 0.34]              | 0.08 [0.05, 0.13] <sup>*,‡</sup>   |       | <0.001         |
| CER C20:0 (ng/mgCr)           | 0.52 [0.27, 1.14]  | 0.34 [0.20, 0.60]             | 0.09 [0.06, 0.17] <sup>*,†</sup>   | 1.07 [0.79, 2.03] <sup>‡</sup> | 0.37 [0.29, 0.49] <sup>‡,§</sup>   |       | <0.001         |
| CER C22:0 (ng/mgCr)           | 0.98 [0.41, 1.87]  | 0.52 [0.38, 0.74]             | 0.10 [0.07, 0.19] <sup>*,†</sup>   | 1.46 [0.92, 2.03] <sup>‡</sup> | 0.82 [0.59, 1.03] <sup>‡</sup>     |       | <0.001         |
| CER C24:0 (ng/mgCr)           | 1.42 [0.59, 2.25]  | 1.04 [0.85, 1.90]             | 0.28 [0.18, 0.50] <sup>*,†</sup>   | 1.84 [1.21, 2.85] <sup>‡</sup> | 2.09 [1.52, 3.14] <sup>†,‡</sup>   |       | <0.001         |
| Moderate (150-499 mg/gCr)     |                    |                               |                                    |                                |                                    |       |                |
| n                             | 0                  | 32                            | 34                                 | 10                             | 22                                 |       |                |
| SIP (nmol/mgCr)               | -                  | 0.22 [0.14, 0.42]             | 0.51 [0.34, 0.63]                  | 0.16 [0.08, 0.24] <sup>‡</sup> | 0.14 [0.00, 0.31] <sup>‡</sup>     |       | 0.005          |
| dhSIP (nmol/mgCr)             | -                  | 0.36 [0.00, 4.42]             | 3.01 [0.00, 6.57]                  | 0.00 [0.00, 5.02]              | 2.37 [0.93, 4.92]                  |       | 0.303          |
| Sphingosine (ng/mgCr)         | -                  | 1.36 [0.65, 2.09]             | 0.38 [0.17, 0.57] <sup>†</sup>     | 0.85 [0.44, 1.18] <sup>‡</sup> | 2.09 [1.58, 3.66] <sup>§</sup>     |       | <0.001         |
| dhSph (ng/mgCr)               | -                  | 0.45 [0.23, 1.31]             | 0.36 [0.18, 0.50]                  | 0.35 [0.12, 1.03]              | 0.54 [0.36, 0.96]                  |       | 0.24           |
| CER C16:0 (ng/mgCr)           | -                  | 1.19 [0.76, 2.90]             | 0.71 [0.44, 1.20]                  | 1.68 [1.26, 2.10] <sup>‡</sup> | 2.89 [1.64, 6.90] <sup>†,‡</sup>   |       | <0.001         |
| CER C18:0 (ng/mgCr)           | -                  | 0.23 [0.18, 0.60]             | 0.14 [0.10, 0.23] <sup>†</sup>     | 0.31 [0.18, 1.16] <sup>‡</sup> | 0.56 [0.43, 0.85] <sup>†,‡</sup>   |       | <0.001         |
| CER C18:1 (ng/mgCr)           | -                  | 0.05 [0.03, 0.35]             | 0.04 [0.02, 0.06]                  | 0.07 [0.04, 0.36]              | 0.21 [0.09, 0.30] <sup>‡</sup>     |       | 0.001          |
| CER C20:0 (ng/mgCr)           | -                  | 0.31 [0.19, 0.73]             | 0.22 [0.13, 0.34]                  | 0.84 [0.35, 1.48] <sup>‡</sup> | 0.66 [0.42, 1.13] <sup>‡</sup>     |       | <0.001         |
| CER C22:0 (ng/mgCr)           | -                  | 0.44 [0.31, 2.03]             | 0.24 [0.13, 0.48] <sup>†</sup>     | 0.99 [0.49, 1.61] <sup>‡</sup> | 1.29 [1.01, 2.41] <sup>†,‡</sup>   |       | <0.001         |
| CER C24:0 (ng/mgCr)           | -                  | 1.06 [0.73, 3.44]             | 0.66 [0.40, 0.83] <sup>†</sup>     | 1.28 [0.89, 2.77] <sup>‡</sup> | 3.98 [2.81, 6.22] <sup>†,‡,§</sup> |       | <0.001         |
| Severe (over 500 mg/gCr)      |                    |                               |                                    |                                |                                    |       |                |
| n                             | 0                  | 77                            | 68                                 | 19                             | 31                                 |       |                |
| SIP (nmol/mgCr)               | -                  | 0.37 [0.15, 0.73]             | 0.87 [0.48, 2.53] <sup>†</sup>     | 0.32 [0.17, 0.46] <sup>‡</sup> | 0.47 [0.26, 0.92] <sup>‡</sup>     |       | <0.001         |
| dhSIP (nmol/mgCr)             | -                  | 0.00 [0.00, 5.03]             | 3.23 [0.12, 8.62]                  | 0.00 [0.00, 3.96]              | 1.66 [0.71, 2.93]                  |       | 0.012          |
| Sphingosine (ng/mgCr)         | -                  | 1.45 [0.79, 2.95]             | 1.82 [0.93, 4.41]                  | 1.49 [0.73, 2.73]              | 3.39 [1.78, 5.81] <sup>†,§</sup>   |       | 0.01           |
| dhSph (ng/mgCr)               | -                  | 0.50 [0.18, 1.60]             | 0.61 [0.32, 2.09]                  | 0.39 [0.21, 2.97]              | 0.73 [0.38, 1.18]                  |       | 0.36           |
| CER C16:0 (ng/mgCr)           | -                  | 2.16 [1.20, 7.96]             | 3.25 [0.93, 11.57]                 | 3.58 [1.08, 7.12]              | 4.35 [2.85, 10.32]                 |       | 0.088          |
| CER C18:0 (ng/mgCr)           | -                  | 0.41 [0.23, 1.21]             | 0.72 [0.19, 1.86]                  | 0.61 [0.29, 1.58]              | 0.80 [0.59, 1.87]                  |       | 0.189          |

|                     |   |                   |                   |                   |                                |       |
|---------------------|---|-------------------|-------------------|-------------------|--------------------------------|-------|
| CER C18:1 (ng/mgCr) | - | 0.10 [0.04, 0.37] | 0.13 [0.04, 0.39] | 0.12 [0.06, 0.61] | 0.19 [0.10, 0.47]              | 0.194 |
| CER C20:0 (ng/mgCr) | - | 0.58 [0.27, 1.40] | 1.21 [0.25, 3.42] | 1.00 [0.49, 1.89] | 0.85 [0.55, 1.96]              | 0.278 |
| CER C22:0 (ng/mgCr) | - | 1.22 [0.49, 3.00] | 1.53 [0.39, 7.22] | 1.70 [0.59, 4.72] | 1.99 [1.28, 3.40]              | 0.171 |
| CER C24:0 (ng/mgCr) | - | 2.51 [1.35, 5.44] | 2.28 [0.81, 9.52] | 3.64 [1.16, 8.32] | 5.20 [3.81, 7.72] <sup>†</sup> | 0.032 |

Data was presented as median [interquartile range] for the -variables.

Abbreviations: CER, ceramide; dhS1P, dihydrosphingosine 1-phosphate; dhSph, dihydrosphingosine; S1P, sphingosine 1-phosphate.

\*:  $P < 0.05$  vs. control, †:  $P < 0.05$  vs. chronic glomerulonephritis, ‡:  $P < 0.05$  vs. diabetes mellitus, §:  $P < 0.05$  vs. arterial hypertension.
